# Supplementary material for: Comparison of Genomes of Three Xanthomonas oryzae Bacteriophages
Source: PubMed Central journal article supplement (PMC2248197; doi:10.1186/1471-2164-8-442), 2007-11-29
Supplement: 1471-2164-8-442-S1.pdf [file 1471-2164-8-442-S1.pdf]

| Additional file1: Gene assignment of <i>Xanthomonas oryzae</i> phage Xop411. |       |       |                          |             |                                  |                                                                                                                                    |
|------------------------------------------------------------------------------|-------|-------|--------------------------|-------------|----------------------------------|------------------------------------------------------------------------------------------------------------------------------------|
| Xop411 Gene <sup>a</sup>                                                     | Start | Stop  | G+C/3rd (%) <sup>b</sup> | Length (aa) | Function                         | The next best match ORF other than that from Xp10 and OPI (identity%, gi number)                                                   |
| +p01                                                                         | 111   | 329   | 56/49                    | 72          | hypothetical protein             |                                                                                                                                    |
| +p02                                                                         | 326   | 631   | 61/65                    | 101         | hypothetical protein             |                                                                                                                                    |
| +p06                                                                         | 743   | 2452  | 54/62                    | 569         | terminase large subunit          | Z6045 in <i>E. coli</i> O157:H7 EDL933 prophage CP-933P (48%, 15801961)                                                            |
| +p07                                                                         | 2462  | 3760  | 53/54                    | 432         | head portal protein              | DaciDRAFT_2373 in <i>Delftia acidovorans</i> SPH-1 phage HK97 family (47%, 118730339)                                              |
| +p08                                                                         | 3769  | 4506  | 51/53                    | 245         | protease of the ClpP family      | S34 in <i>Delftia acidovorans</i> SPH-1 phage HK97 family (43%, 118730338)                                                         |
| +p09                                                                         | 4525  | 5697  | 59/63                    | 390         | head protein                     | TM1040_1668 in <i>Silicibacter</i> sp. TM1040 phage HK97 family (47%, 99081509)                                                    |
| +p10                                                                         | 5745  | 6092  | 50/50                    | 115         | phage coat protein               | gp7 in <i>Burkholderia</i> phage phi1026b (34%, 38707897)                                                                          |
| +p11                                                                         | 6092  | 6466  | 50/47                    | 124         | head-tail joining protein        | Aave_1775 in <i>Acidovorax avenae</i> subsp. citrulli AAC00-1 (38%, 120610456)                                                     |
| +p12*                                                                        | 6570  | 6929  | 52/51                    | 119         | conserved phage protein          | BAV1467 in <i>Bordetella avium</i> 197N (36%, 115422554)                                                                           |
| +p13                                                                         | 6926  | 7282  | 51/50                    | 118         | phage coat protein               | BAV1468 in <i>Ralstonia solanacearum</i> GMI1000 (31%, 115422555)                                                                  |
| +p14                                                                         | 7305  | 7937  | 57/62                    | 210         | major tail                       | BP3369 in <i>Bordetella pertussis</i> Tohama I (33%, 33594257)                                                                     |
| +p15                                                                         | 7940  | 8242  | 52/62                    | 100         | hypothetical protein             |                                                                                                                                    |
| +p16*                                                                        | 8251  | 8553  | 53/58                    | 100         | conserved phage protein          | DaciDRAFT_0025 in <i>Delftia acidovorans</i> SPH-1 (32%, 118734511)                                                                |
| +p17*                                                                        | 8858  | 9367  | 50/57                    | 169         | HNH endonuclease                 | ORF257 in <i>Salmonella</i> phage Felix 01 (42%, 38707764)                                                                         |
| +p18                                                                         | 9408  | 12404 | 54/55                    | 998         | tail length tape measure protein | Sputw3181_2470 in <i>Shewanella</i> sp. W3-18-1 lambda family phage (42%, 38707764)                                                |
| +p19                                                                         | 12401 | 12757 | 47/50                    | 118         | tail protein                     | T in <i>Xanthomonas campestris</i> pv. pelargonii phage Xp15 (41%, 66392069)                                                       |
| +p20                                                                         | 12754 | 13212 | 46/49                    | 152         | tail protein                     | U in <i>Xanthomonas campestris</i> pv. pelargonii phage Xp15 (33%, 66392125)                                                       |
| +p21                                                                         | 13214 | 13606 | 47/45                    | 130         | peptidoglycan hydrolase          | V in <i>Xanthomonas campestris</i> pv. pelargonii phage Xp15 (36%, 66392070)                                                       |
| +p22                                                                         | 13591 | 18312 | 51/49                    | 1573        | tail protein                     | W in <i>Xanthomonas campestris</i> pv. pelargonii phage Xp15 (44%, 66392071)                                                       |
| +p23                                                                         | 18357 | 18647 | 45/38                    | 96          | hypothetical protein             |                                                                                                                                    |
| +p24                                                                         | 18647 | 19342 | 47/38                    | 231         | conserved phage protein          | RSc1699 in <i>Ralstonia solanacearum</i> GMI1000 (26%, 17546418)                                                                   |
| -p25                                                                         | 19710 | 19339 | 53/63                    | 123         | hypothetical protein             |                                                                                                                                    |
| +p26                                                                         | 19828 | 21189 | 52/51                    | 453         | tail fiber                       | CV0418 in <i>Chromobacterium violaceum</i> ATCC 12472 (33%, 34495873)                                                              |
| +p27                                                                         | 21192 | 21401 | 46/49                    | 69          | hypothetical protein             |                                                                                                                                    |
| +p27.1                                                                       | 21419 | 21715 | 51/52                    | 98          | putative holin                   |                                                                                                                                    |
| +p28                                                                         | 21612 | 22148 | 54/59                    | 178         | phage-type lysozyme              | CV0727 in <i>Chromobacterium violaceum</i> ATCC 12472 (48%, 34496182)<br>SSON_2437 in <i>Shigella sonnei</i> Ss046 (45%, 74312894) |
| +p29                                                                         | 22117 | 22452 | 52/46                    | 111         | hypothetical protein             |                                                                                                                                    |
| -p30                                                                         | 22846 | 22670 | 49/60                    | 58          | hypothetical protein             |                                                                                                                                    |

|         |       |       |       |     |                                                           |                                                                                      |
|---------|-------|-------|-------|-----|-----------------------------------------------------------|--------------------------------------------------------------------------------------|
| -p31    | 23717 | 22836 | 53/60 | 293 | DNA ligase                                                |                                                                                      |
| -p31.1* | 24196 | 23714 | 53/63 | 160 | HNH endonuclease                                          | YE2335 in <i>Yersinia enterocolitica</i> subsp. enterocolitica 8081 (41%, 123442580) |
| -p32    | 26774 | 24534 | 53/57 | 746 | T7-like RNA polymerase                                    | AGR_C_2186 in <i>Agrobacterium tumefaciens</i> str. C58 (34%, 15888521)              |
| -p33    | 27568 | 26801 | 57/59 | 255 | hypothetical protein                                      | BradDRAFT_0915 in <i>Bradyrhizobium</i> sp. BTAi1 (60%, 78699704)                    |
| -p34*   | 27825 | 27565 | 44/44 | 86  | hypothetical protein                                      | Rsph17029_0652 in <i>Rhodobacter sphaeroides</i> ATCC 17029 (43%, 126461423)         |
| -p35    | 28572 | 27835 | 54/69 | 245 | DNA polymerase I                                          | BURPS1710b_1651 in <i>Pseudomonas aeruginosa</i> strain LAK1 (47%, 76810908)         |
| -p36    | 29065 | 28661 | 54/57 | 134 | packaging and recombination endonuclease VII              | gp33 in <i>Pseudomonas aeruginosa</i> strain LAK1 (39%, 114796463)                   |
| -p37    | 29997 | 29068 | 53/54 | 309 | DNA polymerase I                                          | gp22 in <i>Pseudomonas aeruginosa</i> strain LAK16 (30%, 114796401)                  |
| -p38    | 30807 | 30010 | 52/58 | 266 | hypothetical protein                                      | BURPS1710b_1650 in <i>Burkholderia pseudomallei</i> 1710b (45%, 76809154)            |
| -p39    | 33191 | 30810 | 51/58 | 793 | DNA polymerase I                                          | BURPS1710b_1649 in <i>Burkholderia pseudomallei</i> 1710b (44%, 76810071)            |
| -p41    | 34302 | 33181 | 54/64 | 374 | replicative helicase                                      | BURPS1710b_1647 in <i>Burkholderia pseudomallei</i> 1710b (38%, 76811336)            |
| -p42    | 35336 | 34494 | 55/60 | 280 | DNA primase                                               | ORF14 in <i>Pseudomonas aeruginosa</i> LKD16 (28%, 116077876)                        |
| -p42.1  | 36069 | 35566 | 50/57 | 167 | HNH endonuclease                                          | ECs3504 in <i>Escherichia coli</i> O157:H7 (41%, 15832758)                           |
| -p43    | 36205 | 36044 | 54/48 | 53  | hypothetical protein                                      |                                                                                      |
| -p44    | 36890 | 36222 | 55/51 | 222 | hypothetical protein                                      | Bcep1808_1157 in <i>Burkholderia vietnamiensis</i> G4 (34%, 134295268)               |
| -p45    | 37313 | 36996 | 54/55 | 105 | hypothetical protein                                      |                                                                                      |
| -p46    | 37531 | 37310 | 53/66 | 73  | inhibitor of transcription initiation and anti-terminator |                                                                                      |
| -p48    | 38179 | 37775 | 46/41 | 134 | hypothetical protein                                      |                                                                                      |
| -p49    | 38743 | 38204 | 50/56 | 179 | hypothetical protein                                      |                                                                                      |
| -p51*   | 39242 | 38817 | 50/56 | 141 | peptidase of the HslV family                              | orf27 in <i>Salmonella enterica</i> phage KS7 (32%, 62327334)                        |
| -p52    | 39428 | 39276 | 49/67 | 50  | hypothetical protein                                      |                                                                                      |
| -p53    | 39798 | 39607 | 54/70 | 63  | HNH endonuclease                                          |                                                                                      |
| -p54    | 40190 | 39855 | 55/58 | 111 | hypothetical protein                                      |                                                                                      |
| -p55    | 40363 | 40193 | 48/51 | 56  | hypothetical protein                                      |                                                                                      |
| -p55.1  | 41023 | 40454 | 53/60 | 189 | HNH endonuclease                                          | ORF257 in <i>Salmonella</i> phage Felix 01 (32%, 62327334)                           |
| -p56    | 41257 | 41060 | 50/57 | 65  | hypothetical protein                                      |                                                                                      |
| +p57    | 41802 | 42146 | 45/46 | 114 | hypothetical protein                                      |                                                                                      |
| +p57.1* | 42165 | 42998 | 48/54 | 277 | HNH endonuclease                                          |                                                                                      |
| +p58    | 43029 | 43553 | 51/57 | 174 | HNH endonuclease                                          | BDAG_01666 in <i>Burkholderia dolosa</i> AUO158 (29%, 124895048)                     |
| +p60*   | 44090 | 44449 | 56/63 | 119 | HNH endonuclease                                          | Mpe_A0538 in <i>Methylibium petroleiphilum</i> PM1 (51%, 124265731)                  |

<sup>a</sup> Asterisk indicates the gene to be using GTG as the start codon. "+" denotes the positive strand, whereas "-" the complementary strand.

<sup>b</sup> Percentage of G + C content for the gene and the third position in codons.
