# Supplementary material for: Comparison of Genomes of Three Xanthomonas oryzae Bacteriophages
Source: PubMed Central journal article supplement (PMC2248197; doi:10.1186/1471-2164-8-442), 2007-11-29
Supplement: 1471-2164-8-442-S2.pdf [file 1471-2164-8-442-S2.pdf]

**Additional file 2: Similarities shared between the Xop411 proteins and those of *Xylella* and *Xanthomonas*.**

| Xop411 protein | Strain                                           | Accession number | Functional annotation       | Identity with Xop411 (%) | E-value |
|----------------|--------------------------------------------------|------------------|-----------------------------|--------------------------|---------|
| p08            | <i>Xylella fastidiosa</i> Ann-1                  | ZP_00680226      | peptidase S14               | 29                       | 9e-16   |
|                | <i>Xylella fastidiosa</i> Dixon                  | ZP_00652933      | peptidase S14               | 29                       | 1e-15   |
|                | <i>Xylella fastidiosa</i> 9a5c                   | NP_297801        | hypothetical protein XF0511 | 31                       | 4e-15   |
| p28            | <i>Xylella fastidiosa</i> 9a5c                   | NP_297803        | phage-related endolysin     | 34                       | 6e-13   |
|                | <i>Xylella fastidiosa</i> Ann-1                  | ZP_00681324      | phage-related endolysin     | 34                       | 2e-13   |
|                | <i>Xylella fastidiosa</i> Dixon                  | ZP_00652935      | glycoside hydrolase         | 34                       | 2e-13   |
|                | <i>Xylella fastidiosa</i> Temecula-1             | NP_779208        | phage-related lysozyme      | 38                       | 6e-13   |
|                | <i>Xanthomonas axonopodis</i> pv. citri str. 306 | NP_641407        | phage-related lysozyme      | 42                       | 7e-16   |
| p39            | <i>Xylella fastidiosa</i> Temecula-1             | NP_778627        | DNA polymerase I            | 25                       | 1e-13   |
|                | <i>Xylella fastidiosa</i> Ann-1                  | ZP_00681639      | DNA-directed DNA polymerase | 25                       | 1e-13   |
|                | <i>Xylella fastidiosa</i> 9a5c                   | NP_298393        | DNA polymerase I            | 25                       | 2e-13   |
|                | <i>Xylella fastidiosa</i> Dixon                  | ZP_00652340      | DNA polymerase A            | 25                       | 1e-13   |
