# Supplementary material for: Comparison of Genomes of Three Xanthomonas oryzae Bacteriophages
Source: PubMed Central journal article supplement (PMC2248197; doi:10.1186/1471-2164-8-442), 2007-11-29

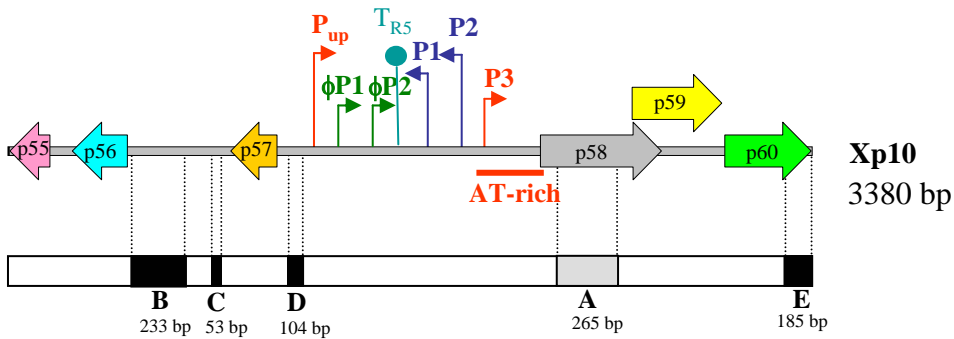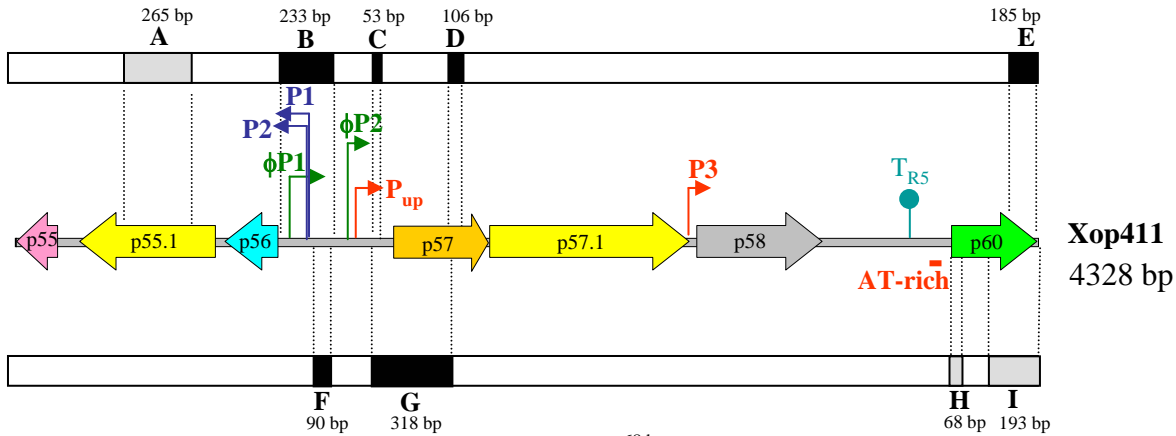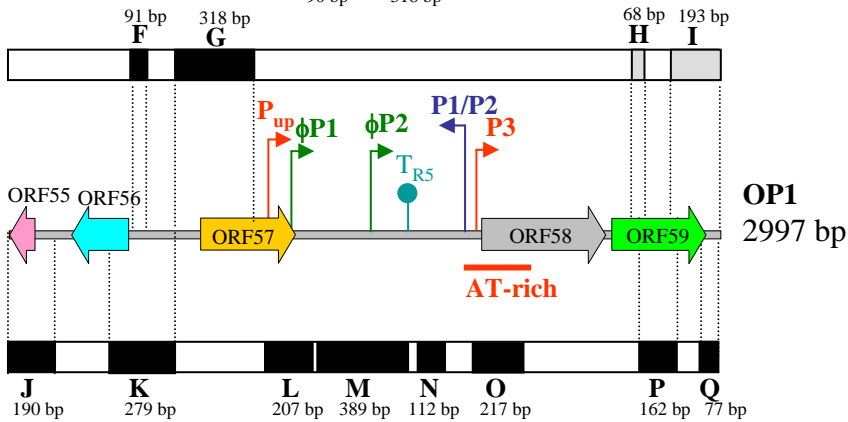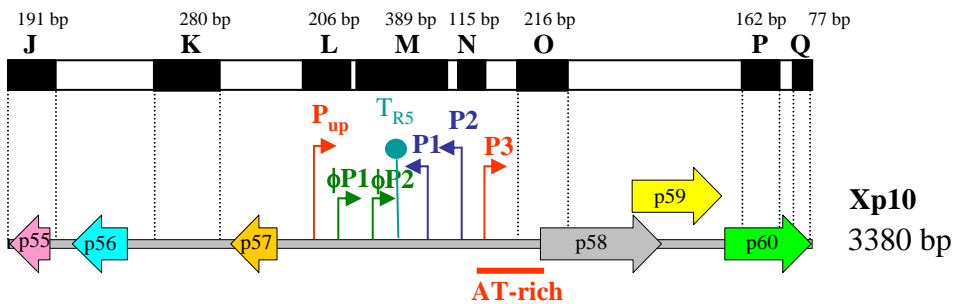

Supplement: 1471-2164-8-442-S4.pdf [file 1471-2164-8-442-S4.pdf]
