# Supplementary material for: Comparison of Genomes of Three Xanthomonas oryzae Bacteriophages
Source: PubMed Central journal article supplement (PMC2248197; doi:10.1186/1471-2164-8-442), 2007-11-29
Supplement: 1471-2164-8-442-S5.pdf [file 1471-2164-8-442-S5.pdf]

|            |       |                                           |       |         |
|------------|-------|-------------------------------------------|-------|---------|
| Xop411 φP1 | 41335 | CAAGAT <b>GACGCAC</b> AGCA <b>AG</b> CCAA | 41357 | } 12/23 |
| Xp10 φP1   | 42330 | AGTGGT <b>GAGGCAC</b> CTAT <b>AG</b> AGAA | 42352 |         |
| OP1 φP1    | 41975 | AGGGGT <b>GAGGCAC</b> CTAT <b>AG</b> AGAA | 41997 |         |

|            |       |                                           |       |         |
|------------|-------|-------------------------------------------|-------|---------|
| Xop411 φP2 | 41565 | GCGTCA <b>GAAGA</b> ACCCG <b>AG</b> TGCC  | 41587 | } 13/23 |
| Xp10 φP2   | 42954 | GCGACT <b>GAGGCAC</b> CTAT <b>AG</b> AGAA | 42616 |         |
| OP1 φP2    | 42232 | GCGACT <b>GAGGCAC</b> CTAT <b>AG</b> AGAA | 42254 |         |

|           |       |                                                          |       |                     |         |  |
|-----------|-------|----------------------------------------------------------|-------|---------------------|---------|--|
|           |       | <u>-35</u>                                               |       | <u>extended -10</u> |         |  |
| Xop411 P1 | 41400 | <b>GTACTT</b> ACGATTGCAGAAG- <b>TGGTTATGTG</b> CGCCTTTGT | 41363 | } 13/38             |         |  |
| Xp10 P1   | 43006 | <b>GTAATT</b> GTCTTATGCTTTG <b>CTG-TTATAAT</b> GCTTCAATT | 42969 |                     |         |  |
| OP1 P1    | 42648 | <b>TCAATT</b> GATATGC-TTTTT <b>CTG-TTATT-T</b> GCTTCAATT | 42613 |                     | } 26/38 |  |

|           |       |                                                                   |       |                     |         |  |
|-----------|-------|-------------------------------------------------------------------|-------|---------------------|---------|--|
|           |       | <u>-35</u>                                                        |       | <u>extended -10</u> |         |  |
| Xop411 P2 | 41366 | <b>TTGTAC</b> GGCTTGGCTT <b>GCTG-TG-CGT</b> CATCTT <b>GT</b> CAGC | 41330 | } 15/38             |         |  |
| Xp10 P2   | 43059 | <b>ATGTAT</b> ATACGGTATAT <b>CACGTGATAAT</b> CTACT <b>GT</b> AG   | 43022 |                     |         |  |
| OP1 P2    | 42635 | <b>ATGTAT</b> ATACGGT <b>GATAAA-TGCTTCAAT</b> TGATATGCT           | 42671 |                     | } 21/38 |  |

|           |       |                                                                 |       |                     |         |  |
|-----------|-------|-----------------------------------------------------------------|-------|---------------------|---------|--|
|           |       | <u>-35</u>                                                      |       | <u>extended -10</u> |         |  |
| Xop411 P3 | 42973 | <b>TTGACA</b> ACTGGCC-ATGAAAG <b>ATGTTAAACT</b> GGCAGCATC       | 43010 | } 24/39             |         |  |
| Xp10 P3   | 43108 | <b>TTGACA</b> ACAGACTA-CAAAC <b>ATGCATACT</b> ATTAT <b>GGTC</b> | 43145 |                     |         |  |
| OP1 P3    | 42721 | <b>TTGACA</b> ACAGACTAA <b>CAAACATGCATACT</b> ATTAT <b>GGTC</b> | 42759 |                     | } 38/39 |  |

|                        |       |                                                                    |       |            |         |  |
|------------------------|-------|--------------------------------------------------------------------|-------|------------|---------|--|
|                        |       | <u>-35</u>                                                         |       | <u>-10</u> |         |  |
| Xop411 P <sub>up</sub> | 41620 | <b>ATGGAT</b> CTTGGCGGCGA <b>AACTCACTGATCT</b> TC <b>TTGT</b> CAGT | 41658 | } 20/39    |         |  |
| Xp10 P <sub>up</sub>   | 42218 | <b>TTGACA</b> ATTTGTGGCGGGTCT <b>GTGAAAT</b> CGTT <b>GC</b> ACTG   | 42256 |            |         |  |
| OP1 P <sub>up</sub>    | 41862 | <b>TTGACA</b> ATTTGGCGGGGGTCT <b>GTGAAAT</b> CGTT <b>GT</b> ACTG   | 41900 |            | } 37/39 |  |
