# Supplementary material for: Comparison of Genomes of Three Xanthomonas oryzae Bacteriophages
Source: PubMed Central journal article supplement (PMC2248197; doi:10.1186/1471-2164-8-442), 2007-11-29
Supplement: 1471-2164-8-442-S6.pdf [file 1471-2164-8-442-S6.pdf]

|        |                                                    |                                                 |       |    |
|--------|----------------------------------------------------|-------------------------------------------------|-------|----|
|        |                                                    | ①                                               | ①     |    |
| Xop411 | MAIVNI DLDTPRPDGGKPGDDARVAFGKVNNGNFADVQSQITAEVSAR  | QSAISAVQTTVAAKASSDLAAEISAR                      | ----- | 73 |
| Xp10   | MAIVNI DLDTPRPDGGKPGDDARVAFSKVNANFADVQSQITAEVSAR   | QSAISSVQTTVAAKATSSDLAAEISAR                     | ----- | 73 |
| OP1    | MAIVNI DLDTPRPDGGKPGDDARAFAFSKVNNSNFADVQSQITAEVSAR | QSAISSVQTTVATKASSDLASEISAR                      | ----- | 73 |
| OP1hc  | MAIVNI DLDTPRPDGGKPGDDARAFAFSKVNNSNFADVQSQITAEVSAR | QSAISSVQTTVATKASSDLASEISARQSAISSVQTTVATKASSDLAS | ----- | 95 |
| OP1h   | MAIVNI DLDTPRPDGGKPGDDARVAFGKVNNGNFADVQSQITAEVSAR  | QSAISAVQTTVAAKASSDLAAEISAR                      | ----- | 73 |
| OP1h2  | MAIVNI DLDTPRPDGGKPGDDARVAFSKVNANFADVQSQITAEVSAR   | QSAISSVQTTVASKATSSDLAAEISAR                     | ----- | 73 |
| OP1h2c | MAIVNI DLDTPRPDGGKPGDDARVAFSKVNANFADVQSQITAEVSAR   | QSAISSVQTTVASKATSSDLAAEISAR                     | ----- | 73 |

|        |                                                           |       |       |                                   |        |
|--------|-----------------------------------------------------------|-------|-------|-----------------------------------|--------|
|        |                                                           | ①     | ①     | ②                                 |        |
| Xop411 | -----                                                     | ----- | ----- | QADNAISATVTAQGQAINQRALSTDLTAEATAR | ---107 |
| Xp10   | -----                                                     | ----- | ----- | QADNAISSTVTAQGQAINQRALSTDLSAEIAAR | ---107 |
| OP1    | -----                                                     | ----- | ----- | QADSAISATVTAQGQAINQRALSADLTAEVAAR | ---107 |
| OP1hc  | EISARQSAISSVQTTVATKASSDLASEISARQSAISSVQTTVATKASSDLASEISAR | ----- | ----- | QADSAISATVTAQGQAINQRALSADLTAEVAAR | ---188 |
| OP1h   | -----                                                     | ----- | ----- | QADNAISATVTAQGQAINQRALSTDLTAEATAR | ---107 |
| OP1h2  | -----                                                     | ----- | ----- | QADNAISATVTAQGQAINQRALSTDLSAEIAAR | ---107 |
| OP1h2c | -----                                                     | ----- | ----- | QADNAISATVTAQGQAINQRALSTDLSAEIAAR | ---107 |

|        |                                                              |       |       |                                                                    |     |
|--------|--------------------------------------------------------------|-------|-------|--------------------------------------------------------------------|-----|
|        |                                                              | ①     | ②     | ②                                                                  |     |
| Xop411 | -----                                                        | ----- | ----- | -----                                                              | 107 |
| Xp10   | -----                                                        | ----- | ----- | QADNAISSTVTAQGQAINQRALSTDLSAEIAARQADNAISSTVTAQGQAINQRALSTDLSAEIAAR | 175 |
| OP1    | -----                                                        | ----- | ----- | -----                                                              | 107 |
| OP1hc  | -----                                                        | ----- | ----- | -----                                                              | 188 |
| OP1h   | -----                                                        | ----- | ----- | -----                                                              | 107 |
| OP1h2  | -----                                                        | ----- | ----- | -----                                                              | 107 |
| OP1h2c | QSAISSVQTTVASKATSSDLAAEISARQADNAISATVTAQGQAINQRALSTDLSAEIAAR | ----- | ----- | -----                                                              | 168 |

|        |                                   |                                                             |     |     |  |
|--------|-----------------------------------|-------------------------------------------------------------|-----|-----|--|
|        |                                   | ③                                                           | ③   | ③   |  |
| Xop411 | QAADASIQATLQAADASIQATLQAADASIQATL | QAADTALGARIDDLVSMVGRNRLNPGFTRASRGPGGTFSNFTTEFYTADQIIVISGVSM | SGS | 202 |  |
| Xp10   | QAADAALQAAQ-----                  | QTADTALGARIDDLVSMTGRNRLNPGFTRASRGPGGTFSNFTTEFYAVDQIIVISGVSM | SGS | 248 |  |
| OP1    | QAADVALQTTL-----                  | QAADTALGSRIDGVLSTGRNRLNPGFTRTRSRGPGGTFSNFTTEFYVDQIIVISGVSM  | SGS | 180 |  |
| OP1hc  | QAADVALQTTL-----                  | QAADTALGSRIDGVLSTGRNRLNPGFTRTRSRGPGGTFSNFTTEFYVDQIIVISGVSM  | SGS | 261 |  |
| OP1h   | QAADASIQATL-----                  | QAADTALGARIDDLVSMVGRNRLNPGFTRASRGPGGTFSNFTTEFYAVDQIIVISGVSM | SGS | 180 |  |
| OP1h2  | QAADASIQATLQAADASIQATL-----       | QAADTALGARIDDLVSMVGRNRLNPGFTRASRGPGGTFSNFTTEFYAVDQIIVISGVSM | SGS | 191 |  |
| OP1h2c | QAADASIQATLQAADASIQATL-----       | QAADTALGARIDDLVSMVGRNRLNPGFTRASRGPGGTFSNFTTEFYAVDQIIVISGVSM | SGS | 252 |  |

|        |                                                                    |                                |     |
|--------|--------------------------------------------------------------------|--------------------------------|-----|
| Xop411 | WGRNQLNGASNTLAAGRNYFAVNI TSANLASVGQKIEGVHTLAGSKATLSVWLRSTVAGKRLGVR | IYQSFGTGGSPSAAVSTIITPTPLTLSTTW | 297 |
| Xp10   | WGRNQLNGASNTLAAGRNYFAVNI TAGSLASVGQKIEGVHTLAGGKATLSVWLRSTVAGKRLGVR | IYQSFGTGGSPSAAVSTIITPTPLTSLATF | 343 |
| OP1    | WGRNQLNGASNTLAAGRNYFAVNI TSANLASVGQKIEGVHTLAGSKATLSVWLRSTVAGKRLGFR | IYQSFGTGGSPSAAVSTIITPTPLTLSTTW | 275 |
| OP1hc  | WGRNQLNGASNTLAAGRNYFAVNI TSANLASVGQKIEGVHTLAGSKATLSVWLRSTVAGKRLGFR | IYQSFGTGGSPSAAVSTIITPTPLTLSTTW | 356 |
| OP1h   | WGRNQLNGASNTLAAGRNYFAVNI TAGSLASVGQKIEGVHTLAGGKATLSVWLRSTVAGKRLGVR | IYQSFGTGGSPSAAVSTIITPTPLTLSTNF | 275 |
| OP1h2  | WGRNQLNGASNTLAAGRNYFAVNI TAGSLASVGQKIEGVHTLAGGKATLSVWLRSTVAGKRLGVR | IYQSFGTGGSPSAAVSTIITPTPLTLSTNF | 286 |
| OP1h2c | WGRNQLNGASNTLAAGRNYFAVNI TAGSLASVGQKIEGVHTLAGGKATLSVWLRSTVAGKRLGVR | IYQSFGTGGSPSAAVSTIITPTPLTLSTNF | 347 |

|        |                                                                                                  |     |
|--------|--------------------------------------------------------------------------------------------------|-----|
| Xop411 | KQYTLTFDVPVSVSGKLTGTNNNDHLYLVFDITNTDSYGGALSQGTGQIELAYPQLEKGSVATEFEFRAPGVEKALCEWYLKAGVVALRGNGTGSA | 392 |
| Xp10   | KQYTLTFDVPVSVSGKLTGTNNNDHLYLVFDIAG-DAYGTALSGQTAQIEFAFPQLEKGSVATDFELRSPGVEKALCEWYLKAGVVALRGNGTGRA | 437 |
| OP1    | KQYTLTFDVPVSVSGKLTGTNNNDHLYLVFDITNTDSYGGALSQGTGQIEFAFPQLEKGSVATEFEFRAPGVEKALCEWYLKAGVVALRGNGTGSA | 370 |
| OP1hc  | KQYTLTFDVPVSVSGKLTGTNNNDHLYLVFDITNTDSYGGALSQGTGQIEFAFPQLEKGSVATEFEFRAPGVEKALCEWYLKAGVVALRGNGTGRA | 451 |
| OP1h   | KQYTLTFDVPVSVSGKLTGTNNNDHLYLVFDITG-DAYGTALSGQTAQIEFAFPQLEKGSVATDFEFRSPGVEKALCEWYLKAGVVALRGNGTGSA | 369 |
| OP1h2  | KQYTLTFDVPVSVSGKLTGTNNNDHLYLVFDITG-DAYGTALSGQTAQIEFAFPQLEKGSVATDFEFRSPGVEKALCEWYLKAGVVALRGNGTGSA | 380 |
| OP1h2c | KQYTLTFDVPVSVSGKLTGTNNNDHLYLVFDITG-DAYGTALSGQTAQIEFAFPQLEKGSVATDFEFRSPGVEKALCEWYLKAGVVALRGNGTGRA | 441 |

|        |                                                             |     |
|--------|-------------------------------------------------------------|-----|
| Xop411 | GAGTFISHEMRAAPAITFANTIYYNCSGINYASYPTGVEVLVATGTFAFYSTYIMSAEL | 458 |
| Xp10   | GAGTFISHEMRAAPAITFANTIYYNCSGINYASHTTGVEVLVATGTFAFYSTYIMSAEL | 498 |
| OP1    | GAGTFISHEMRAAPAITFANTIYYNCSGINYASYPTGVEVLVATGTFAFYSTYIMSAEL | 431 |
| OP1hc  | GAGTFISHEMRAAPAITFANTIYYNCSGINYASYPTGVEVLVATGTFAFYSTYIMSAEL | 512 |
| OP1h   | GAGTFIAHEMRASPAVTFANTIYYNCSGINYVAYPTGVEVLVATGTFAFYSTYIMSAEL | 430 |
| OP1h2  | GAGTFIAHEMRASPAVTFANTIYYNCSGINYAPYPTGVEVLVATGTFAFYSTYIMSAEL | 441 |
| OP1h2c | GAGTFIAHEMRASPAVTFANTIYYNCSGINYAPYPTGVEVLVATGTFAFYSTYIMSAKL | 502 |

## B

| Phage  | Duplication          | Phagovar     |
|--------|----------------------|--------------|
| Xop411 | --①--②--③--③--③--    |              |
| Xp10   | --①--②--②--②--③--    |              |
| OP1    | --①--②--③--          | (A)          |
| OP1hc  | --①--①--①--①--②--③-- | (A, C)       |
| OP1h   | --①--②--③--          | (B)          |
| OP1h2  | --①--②--③--③--       | (A, B, D)    |
| OP1h2c | --①--②--①--②--③--③-- | (A, B, C, D) |
