# Supplementary material for: Comparison of Genomes of Three Xanthomonas oryzae Bacteriophages
Source: PubMed Central journal article supplement (PMC2248197; doi:10.1186/1471-2164-8-442), 2007-11-29
Supplement: 1471-2164-8-442-S7.pdf [file 1471-2164-8-442-S7.pdf]

(A) Xop411 (domain 1-2-3-3)

ATGGCAATTGTAAACATCGACTTAGATACACCTCGTCCAGATGGAAAACCTGGGGAC<sup>IR<sub>1</sub></sup><sub>gacaacg</sub>  
ccc>TGTGGCATTGGAAAGGTGAACGGGAACCTTCGCGGACGTCCAATCCCAGATCACTGCC  
GAagtgtctgcTA<sup>IR<sub>2</sub></sup><sub>ggcag</sub><sup>DR<sub>1</sub></sup>**TCGGCGATATCTGCTGTGCAGACCACCGTGGCAGCAAAGGCATCA**  
**TCCTCTGATCTAGC**<sup>DR<sub>1</sub></sup><sub>ggcag</sub>**AGATTTTCGGCAC**<sup>DR<sub>1</sub></sup><sub>ggcag</sub>**AGTGCGGACAACGCTATCTCCGCTA**  
**CGGTCACAGCTCAAGGACAGGCCATCAACCAGCGTGCCTTAGCACAGATTTGAC**<sup>ggc</sup>  
<sup>DR<sub>1</sub></sup><sub>DR<sub>2</sub></sub>**agAGGCAACAGCAA**<sup>ggcagggcgc</sup>**AGACGCGTCAATACAGGCGACTACAGGCCGCAGAC**  
**GCGTCAATACAGGCGACTA**<sup>DR<sub>2</sub></sup><sub>cagggcgc</sub>**AGACGCGTCAATACAGGCGACTA**<sup>DR<sub>2</sub></sup><sub>cagggcgc</sub>  
<sup>IR<sub>2</sub></sup><sub>act</sub>GCTCTAGGCGCACGAATTGACGATGTGCTGAGCATGGTGGGTGCGAACAGGCTGCTCA  
ACCCAGGATTTACT<sup>IR<sub>1</sub></sup><sub>cgggctc</sub>

(B) Xp10 (domain 1-2-2-3)

ATGGCAATTGTGAACATCGACTTAGATACACCTCGTCCGATGGAAAACCTGGGGACGAC  
GCCC>GTGGCA<sup>IR<sub>3</sub></sup><sub>ttcagcaa</sub>GGTTAATGCTAACTTTGCTGACGTCCAATCCCAGATCAC<sup>DR<sub>1</sub></sup><sub>ggcag</sub>A  
AGTTTCGGCAA<sup>DR<sub>1</sub></sup><sub>ggcag</sub>**TCGGCAATATCTTCTGTGCAGACCACAGTGGCAGCAAAGGCTA**  
**CATCCTCTGACCTTGCAGCAGAGATTTTCGGCAC**<sup>DR<sub>1</sub></sup><sub>ggcag</sub>**AGTGCGGACAACGCTATCTCC**  
**TCCACGGTCACAGCACAAGGACAGGCCATCAACCAGCGTGCCCTTAGCACTGACCTA**  
**TCAGCTGAGATCGCCGCAA**<sup>DR<sub>1</sub></sup><sub>ggcag</sub>**AGTGCGGACAACGCTATCTCCTCCACGGTCACAG**  
**CACAAGGACAGGCCATCAACCAGCGTGCCCTTAGCACTGACCTATCAGCTGAGATCG**  
**CCGCAA**<sup>DR<sub>1</sub></sup><sub>ggcag</sub>**AGTGCGGACAACGCTATCTCCTCCACGGTCACAGCACAAGGACAGGC**  
**CATCAACCAGCGTGCCCTTAGCACTGACCTATCAGCTGAGATCGCCGCAA**<sup>DR<sub>1</sub></sup><sub>DR<sub>2</sub></sub>**ggcagggcgc**  
**AGACGCGGCACTACAGGCGGCGCAG**CAGACAGCAGACACCGCTCTAGGCGCACGTATT  
GATGATGTGTTGTCAATGACGGGCCGTAACAGG<sup>IR<sub>3</sub></sup><sub>ttgctgaa</sub>

(C) OPI (domain 1-2-3)

ATGGCAATTGTGAACATCGACTTAGATACACCTCGTCCAGATGGAAAACCTGGGGACGACG  
CTCGTGCGGCA<sup>IR<sub>3</sub></sup><sub>ttcagcaa</sub>GGTTAATTCAAACCTTCGCGGACGTCCAATCCCAGATCACTGCCGA  
AGTGTCTGCCA<sup>DR<sub>1</sub></sup><sub>ggcag</sub>**TCAGCAATATCTTCTGTGCAGACCACAGTGGCAACAAAGGCTTC**  
**CTCCTCTGACCTTGCCCTCAGAGATTTTCGGCCA**<sup>DR<sub>1</sub></sup><sub>ggcag</sub>**AGTGCCGACAGTGCCATCTCCG**  
**CCACGGTCACAGCACAAG**<sup>DR<sub>1</sub></sup><sub>ggcag</sub>**GCTATCAACCAGCGGCACTCAGTGCCGATTTGACG**  
**GCTGAGGTCGCCGCAA**<sup>DR<sub>1</sub></sup><sub>DR<sub>2</sub></sub>**ggcagggcgc****GGACGTGGCACTACAGACCACACTA**<sup>DR<sub>2</sub></sup><sub>cagggcgc</sub>**AGAT**  
**ACTGCTTTGGGATCCCGCATTGATGGCGTTTTGTCCATGACTGGTCGTAACAA**<sup>IR<sub>3</sub></sup><sub>ttgctgaa</sub>

(D) OPIhc (domain 1-1-1-2-3)

ATGGCAATTGTGAACATCGACTTAGATACACCTCGTCCAGATGGAAAACCTGGGGACGACG  
CTCGTGCGGCA<sup>IR<sub>3</sub></sup><sub>ttcagcaa</sub>GGTTAATTCAAACCTTCGCGGACGTCCAATCCCAGATCACTGCCGA  
AGTGTCTGCCA<sup>DR<sub>1</sub></sup><sub>ggcag</sub>**TCAGCAATATCTTCTGTGCAGACCACAGTGGCAACAAAGGCTTC**  
**CTCCTCTGACCTTGCCCTCAGAGATTTTCGGCCA**<sup>DR<sub>1</sub></sup><sub>ggcag</sub>**TCAGCAATATCTTCTGTGCAGAC**  
**CACAGTGGCAACAAAGGCTTCCTCCTCTGACCTTGCCCTCAGAGATTTTCGGCCA**<sup>DR<sub>1</sub></sup><sub>ggcag</sub>**AGT**  
**CAGCAATATCTTCTGTGCAGACCACAGTGGCAACAAAGGCTTCCTCCTCTGACCTTGC**  
**CTCAGAGATTTTCGGCCA**<sup>DR<sub>1</sub></sup><sub>ggcag</sub>**TCAGCAATATCTTCTGTGCAGACCACAGTGGCAACAA**  
**AGGCTTCCTCCTCTGACCTTGCCCTCAGAGATTTTCGGCCA**<sup>DR<sub>1</sub></sup><sub>ggcag</sub>**AGTGCCGACAGTGCC**

ATCTCCGCCACGGTCA CAGCACAAAG<sup>DR<sub>1</sub></sup>ggcagGCTATCAACCAGCGCGCACTCAGTCCGCA  
<sup>DR<sub>1</sub></sup>TTTGACGGCTGAGGTCGCCGCAaggcagggcggGACGTGGCACTACAGACCCACACTA<sup>DR<sub>2</sub></sup>cag  
<sup>DR<sub>2</sub></sup>gccgcAGATACTGCTTTGGGATCCCGCATTGATGGCGTTTTGTCCATGACTGGTTCGTAACAAAtt  
<sup>IR<sub>3</sub></sup>  
gctgaa

(E) OP1h (domain 1-2-3)

ATGGCAATTGTGAACATCGACTTAGATACACCTCGTCCAGATGGAAAACCTGGGGAC<sup>IR<sub>1</sub></sup>gacgcc  
<sup>DR<sub>1</sub></sup>cgtTGTGGCATTTGAAAGGTGAACGGAACTTCGCGGACGTCCAATCCCAGATCACTGCCG  
AAGTGTCTGCTA<sup>DR<sub>1</sub></sup>ggcagTCGGCGATATCTGCTGTGCAGACCACCGT<sup>DR<sub>1</sub></sup>ggcagCAAAGGCATCA  
TCCTCTGATCTAGC<sup>DR<sub>1</sub></sup>ggcagAGATTTCCGGCCAgg<sup>DR<sub>1</sub></sup>cagGCTGCCGACAATGCCATTTCCGCCA  
CGGTCACAGCACAA<sup>DR<sub>1</sub></sup>GggcagGCTATCAACCAGCGTGCGCTTAGCACAGATTTGAC<sup>DR<sub>1</sub></sup>ggcag  
AGGCAACAGCAA<sup>DR<sub>1</sub></sup>agg<sup>DR<sub>2</sub></sup>cagggcggAGACCGGTCAATACAGGGCGACACTA<sup>DR<sub>2</sub></sup>cag<sup>DR<sub>2</sub></sup>gccgcTGACACTGC  
CCTAGGCGCACGCATTGACGATGTGCTTAGCATGGTTGGCCGTAACAGGTTGCTGAACCCA  
GGATTTACT<sup>IR<sub>1</sub></sup>cgggcgtc

(F) OP1h2 (domain 1-2-3-3)

ATGGCAATTGTGAACATCGACTTAGATACACCTCGTCCGGATGGAAAACCTGGGGAC<sup>IR<sub>1</sub></sup>gacgc  
<sup>IR<sub>3</sub></sup>ccgtTGTGGCAAttcagcaaGGTTAATGCGAACTTtgcctgacgTCCAATCCCAGATCAC<sup>DR<sub>1</sub></sup>ggcagAAGTGT  
GGCAA<sup>DR<sub>1</sub></sup>ggcagTCGGCAATATCTTCTGTGCAGACCACAGTGGCATCAAAGGCTACATCCT  
CTGACCTTGCAGCAGAAATTTCCGGCAC<sup>DR<sub>1</sub></sup>ggcagAGTGCGGACAACGCTATCTCCGCCAC  
GGTCACAGCACAAAGGACAGGCCATCAACCAGCGTGCCCTTAGCACCGACCTATCAGC  
TGAGATCGCCGCA<sup>DR<sub>1</sub></sup>agg<sup>DR<sub>2</sub></sup>cagggcggAGACCGGTCAATACAGGGCGACACTACAGGCCGCA  
CGCGTCAATACAGGGCGACACTA<sup>DR<sub>1</sub></sup>cagggccgcTGACACTGCCCTAGGCGCACGCATTGACGAT  
GTGCTTAGCATGGTTGGCCGTAACAGG<sup>IR<sub>3</sub></sup>ttgctgaaCCCAGGATTTACT<sup>IR<sub>1</sub></sup>cgggcgtcTCGTGGCCCAG  
GGGGTACCTTTACGAATTTACCACAGAGTTTTATGCTGTGACCAAGTGGGTGCTTAGTGG  
<sup>IR<sub>1</sub></sup>  
cgtcagca

(G) OP1h2c (domain 1-2-1-2-3-3)

ATGGCAATTGTGAACATCGACTTAGATACACCTCGTCCGGATGGAAAACCTGGGGAC<sup>IR<sub>1</sub></sup>gacgcc  
<sup>IR<sub>3</sub></sup>cgtTGTGGCAAttcagcaaGGTTAATGCGAACTTTGCTGACGTCCAATCCCAGATCAC<sup>DR<sub>1</sub></sup>ggcagAAGTGT  
CGGCAA<sup>DR<sub>1</sub></sup>ggcagTCGGCAATATCTTCTGTGCAGACCACAGTGGCATCAAAGGCTACATCCT  
CTGACCTTGCAGCAGAAATTTCCGGCAC<sup>DR<sub>1</sub></sup>ggcagAGTGCGGACAACGCTATCTCCGCCACG  
GTCACAGCACAAAGGACAGGCCATCAACCAGCGTGCCCTTAGCACCGACCTATCAGCT  
GAGATCGCCGCA<sup>DR<sub>1</sub></sup>agg<sup>DR<sub>1</sub></sup>cagTCGGCAATATCTTCTGTGCAGACCACAGTGGCATCAAAGGC  
TACATCCTCTGACCTTGCAGCAGAAATTTCCGGCAC<sup>DR<sub>1</sub></sup>ggcagAGTGCGGACAACGCTATCT  
CCGCCACGGTCACAGCACAAAGGACAGGCCATCAACCAGCGTGCCCTTAGCACCGACC  
TATCAGCTGAGATCGCCGCA<sup>DR<sub>1</sub></sup>agg<sup>DR<sub>2</sub></sup>cagggcggAGACCGGTCAATACAGGGCGACACTA<sup>DR<sub>2</sub></sup>cagggcgg  
AGACCGGTCAATACAGGGCGACA<sup>DR<sub>2</sub></sup>CTA<sup>DR<sub>2</sub></sup>cagggccgcTGACACTGCCCTAGGCGCACGCATTGACG  
ATGTGCTTAGCATGGTTGGCCGTAACAGG<sup>IR<sub>3</sub></sup>ttgctgaaCCCAGGATTTACT<sup>IR<sub>1</sub></sup>cgggcgtc
