# Supplementary material for: Comparison of Genomes of Three Xanthomonas oryzae Bacteriophages
Source: PubMed Central journal article supplement (PMC2248197; doi:10.1186/1471-2164-8-442), 2007-11-29
Supplement: 1471-2164-8-442-S8.pdf [file 1471-2164-8-442-S8.pdf]

**Additional file 8 : Identification of the Xop411 virion proteins by mass spectrometry.**

| Size in gel (kDa) | Xop411 Protein / kDa | Xp10 Protein/ kDa | Protein identification           | Peptide sequence matched or coverage (%)                                                                       |
|-------------------|----------------------|-------------------|----------------------------------|----------------------------------------------------------------------------------------------------------------|
| 250               | p09 / 42             | p09 / 41          | major head protein               | QILSDAPQLASYMNNR<br>GTGANDGLLGLIPQATTYAAPTTIAGATR<br>DANNQYLIGNAR<br>LALVVYRPEALISGSFA (18%)                   |
| 200               | p09 / 42             | p09 / 41          | major head protein               | QILSDAPQLASYMNNR<br>DANNQYLIGNAR (7%)                                                                          |
| 160               | p22 / 167            | p22 / 167         | tail protein                     | LSDQTLTIVR<br>ASASALQTLSTK (1%)                                                                                |
| 150               | p09 / 42             | p09 / 41          | major head protein               | QILSDAPQLASYMNNR<br>GTGANDGLLGLIPQATTYAAPTTIAGATR<br>DANNQYLIGNAR<br>LALVVYRPEALISGSFA (18%)                   |
| 105               | p18 / 106            | p18 / 105         | tail length tape measure protein | QSVQSLVTEVDK<br>ALEDQTQDLK<br>NYYAGLR<br>GTEVEVSSIQK<br>SGAIAVQIQLQER (5%)                                     |
| 90 <sup>a</sup>   | -                    | -                 | TonB-dependent receptor FyuA     | GGASSTFTSNAPGGIINFISK<br>YDVNAPYVALTFDMSGK<br>LLFGVVR<br>TQEQNFEITSQR<br>SYEAHGVELEASYR<br>QADVWVQLTPSYR (10%) |
| 78                | p09 / 42             | p09 / 41          | major head protein               | LALVVYRPEALISGSFA (4%)                                                                                         |
| 47                | p07 / 47             | p07 / 47          | head portal protein              | 33%                                                                                                            |
| 42                | p09 / 42             | p09 / 41          | major head protein               | QILSDAPQLASYMNNR<br>DANNQYLIGNAR<br>LALVVYRPEALISGSFA (11%)                                                    |
| 33 <sup>a</sup>   | -                    | -                 | outer membrane MopB protein      | LTNDAPFVTLGLGK<br>AGVGLQTTFDK (6%)                                                                             |
|                   |                      |                   | hypothetical protein XOO0584     | FALPDSADADGITADGR (10%)                                                                                        |
| 31                | p07 / 47             | p07 / 47          | head portal protein              | FLTDDQYDSFAK<br>SLGLNPVDAQLLQSR (6%)                                                                           |
|                   | p26 / 48             | p26 / 52          | tail fiber                       | NQLNGASNTLAAGR<br>ATLSVWLR<br>YTLTFDVPSVSGK (7%)                                                               |
| 28 <sup>a</sup>   | -                    | -                 | outer membrane MopB protein      | LTNDAPFVTLGLGK<br>GWNPYLLFGLGYQR<br>AGVGLQTTFDK<br>GVNFDENK<br>ATTVYDYLTGK (15%)                               |
|                   | -                    | -                 | colicin I receptor CirA          | TTDLDTVNVIK<br>LLDGALPAQFGDR<br>TAAVVDITK<br>NGLENPVDSLNPPLHDK<br>VGLNYLFGSGLR<br>DGGGIGVFAPQWAPR (11%)        |
| 22                | p14 / 22             | p14 / 22          | major tail                       | ASTSSVNLITR<br>LEYSAGTLR (1%)                                                                                  |
| 19 <sup>a</sup>   | -                    | -                 | hypothetical protein XOO4199     | GVDLGDNFYGR<br>LNQNWGINDIR<br>MDGDGNKEWSVGPR (18%)                                                             |
| 13                | p10 / 13             | p10 / 13          | phage coat protein               | HLQAELYEDDER<br>DYVMQQLPAAR (20%)                                                                              |
|                   | p19 / 14             | p19 / 14          | tail protein                     | IGAITVLKPGLVIR (11%)                                                                                           |
| 11                | p13 / 14             | p13 / 14          | phage coat protein               | 67%                                                                                                            |

<sup>a</sup> Identified according to the sequenced genome of *Xanthomonas oryzae* pv. *oryzae* KACC10331
